# Supplementary material for: Nitrogen–phosphorus doped graphitic nano onion-like structures: experimental and theoretical studies
Source: Royal Society of Chemistry journal article supplement (doi:10.1039/d0ra10019f), 2021-01-01
Supplement: d0ra10019f1.pdf [file d0ra10019f1.pdf]

# Supplementary Information

## Nitrogen-Phosphorus Doped Graphitic Nano Onion-Like Structures: Experimental and Theoretical Studies

Armando D. Martínez-Iniesta<sup>1</sup>, Aarón Morelos-Gómez<sup>2</sup>, Emilio Muñoz-Sandoval<sup>1</sup>, Florentino López-Urías<sup>1\*</sup>

<sup>1</sup>*División de Materiales Avanzados, IPICYT, Camino a la Presa San José 2055, Lomas 4a sección, San Luis Potosí, S.L.P., 78216, México.*

<sup>2</sup>*Global Aqua Innovation Center and Research Initiative for Supra-Materials, Shinshu University, 4-17-1 Wakasato, Nagano 380-8553, Japan.*

Fig. S1: Armando D. Martínez-Iniesta et al.

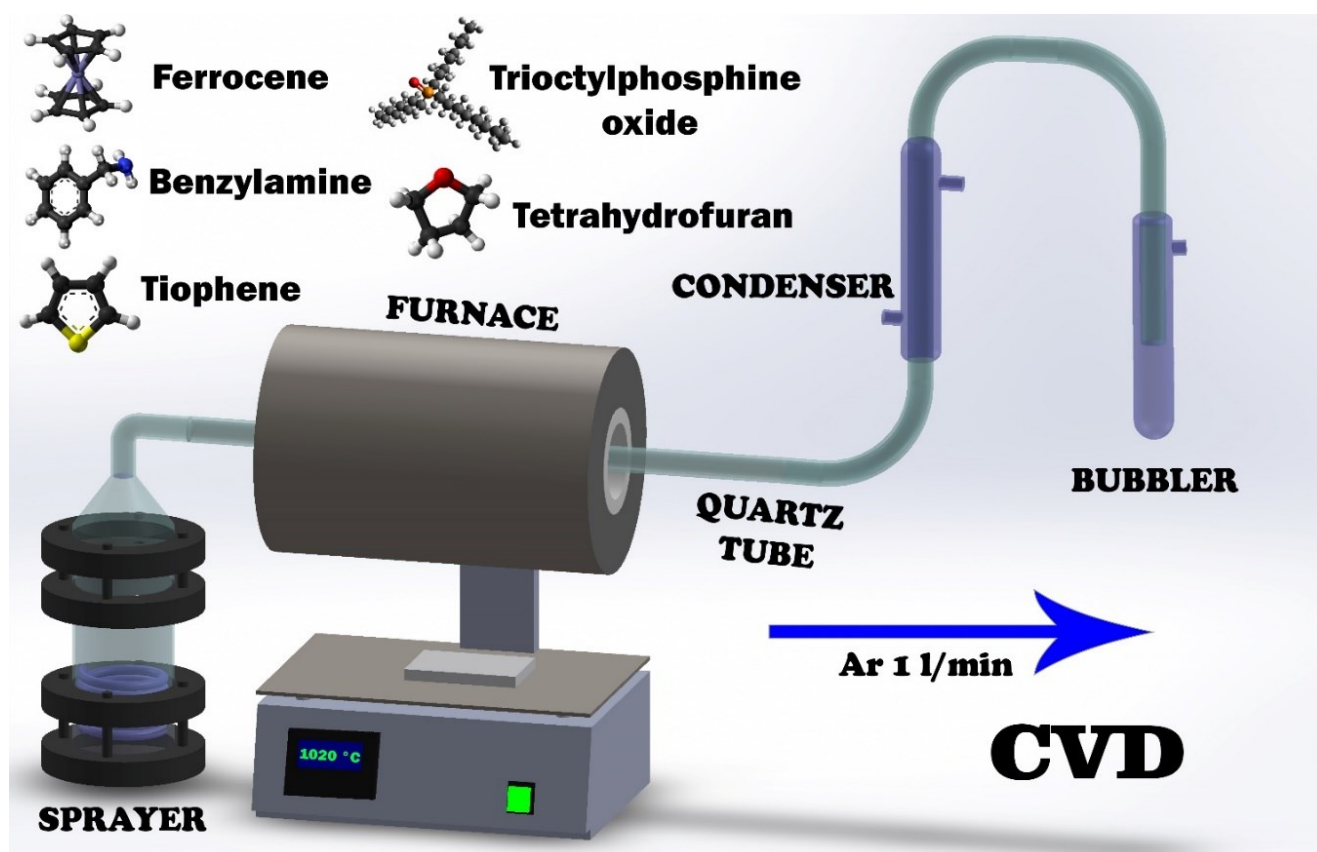

Fig. S1: Schematic representation of aerosol assisted chemical vapor deposition (AACVD) setup used to synthesize nitrogen-phosphorus graphite onion-like structures (NP-GNOs). The NP-GNOs were grown at 1020°C for one hour. The NP-GNOs were collected from the quartz tube by scraping the inner walls. The ball-stick models of the different precursors are shown.

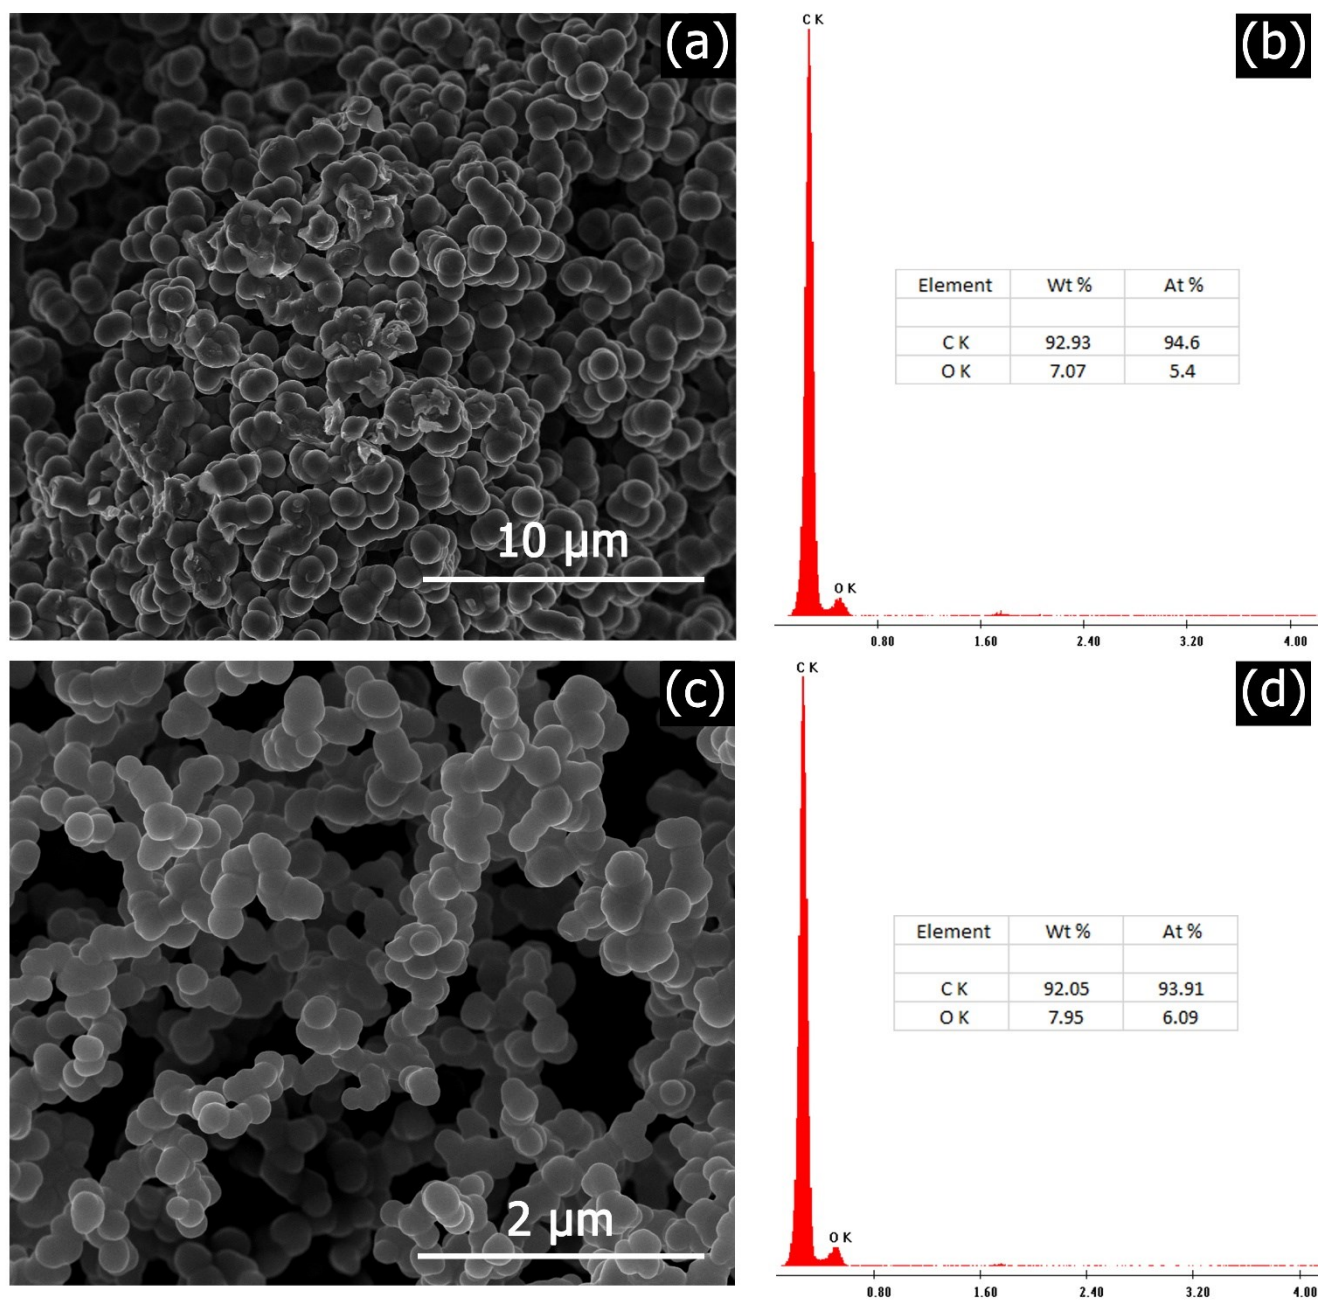

**Fig. S2:** (a) and (c) SEM images of NP-GNOs and their corresponding elemental analysis by EDS (b) and (d).

**Fig. S3:** Armando D. Martínez-Iniesta et al.

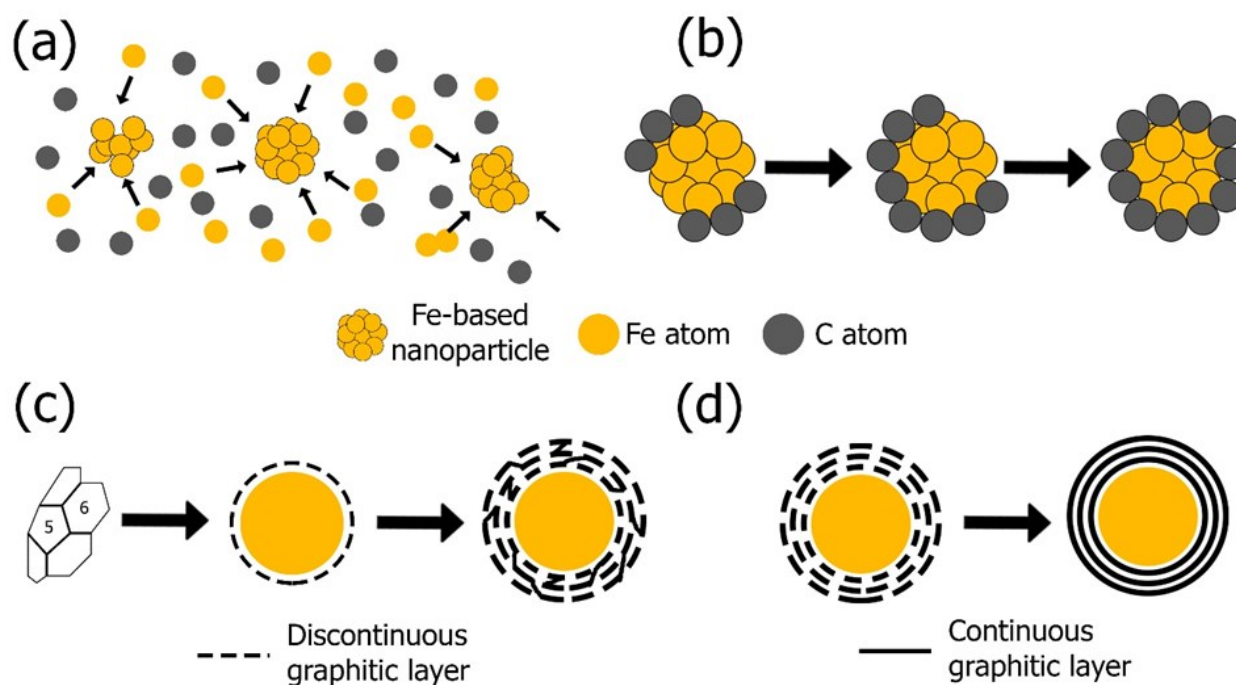

**Fig. S3:** Possible schematic of NP-GNOs growth mechanism. **(a)** The Fe atoms from ferrocene decomposition are brought together, forming small Fe-clusters. **(a)** Fe-nanoparticles are surrounded by carbon released from ferrocene and other precursors (benzylamine, tetrahydrofuran, thiophene, and trioctylphosphine oxide). In this process, the carbon can be accompanied by nitrogen, phosphorus, and oxygen. **(c-d)** Formation of Fe/graphitic core-shell nanoparticles.

Fig. S4: Armando D. Martínez-Iniesta et al.

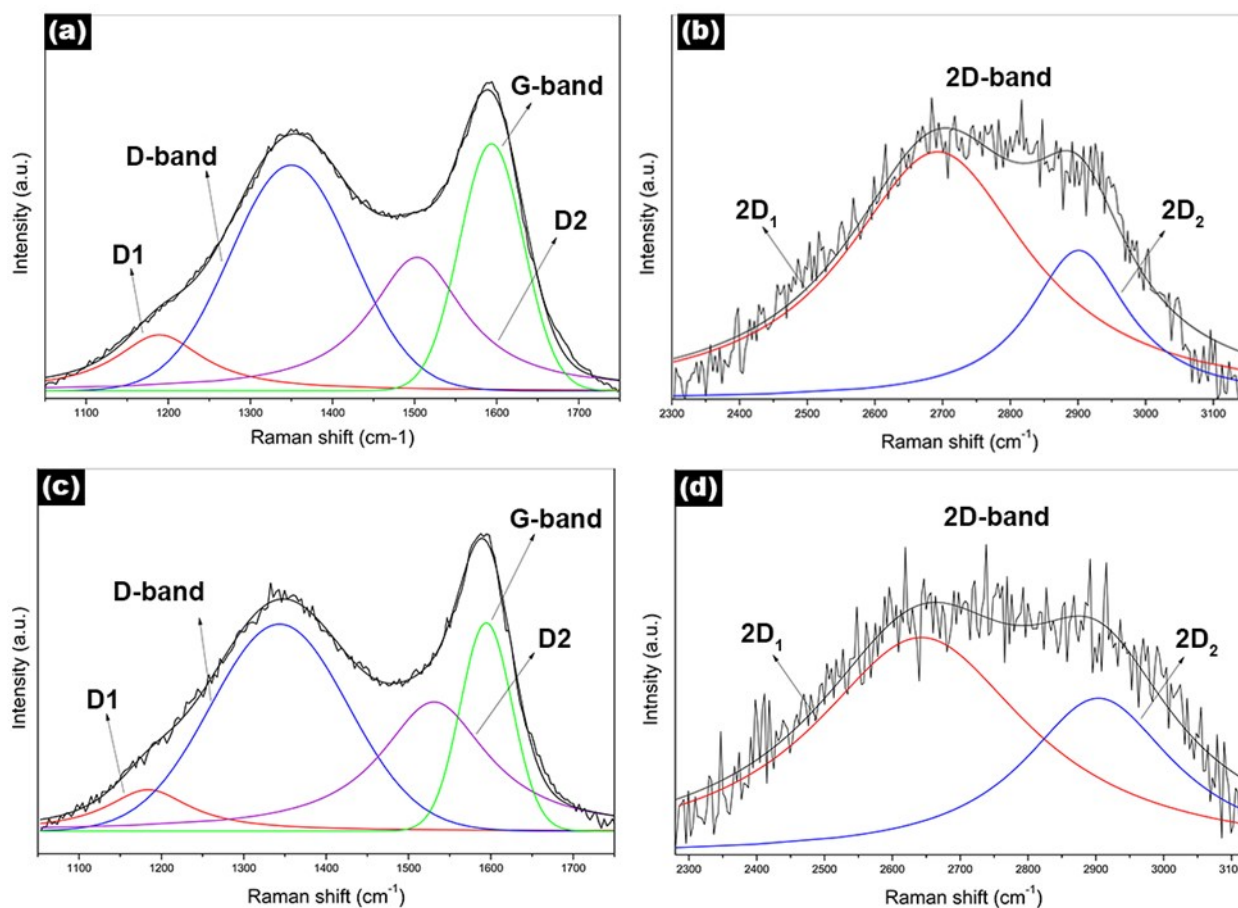

**Fig. S4:** Raman spectra deconvolution analysis for **(a-b)** NP-GNOs and **(c-d)** pristine-GNOs. The deconvolution of Raman spectra using Lorentz and Gaussian fitting (see [Table S1](#)). Notice that there are two more peaks, the formation of D2-peak and D1-peak attributed to the influence in the  $sp^2$  vibration modes by  $-sp^3$  C-H bonding, C-O bonding, and amorphous carbon.

**Fig. S5:** Armando D. Martínez-Iniesta et al.

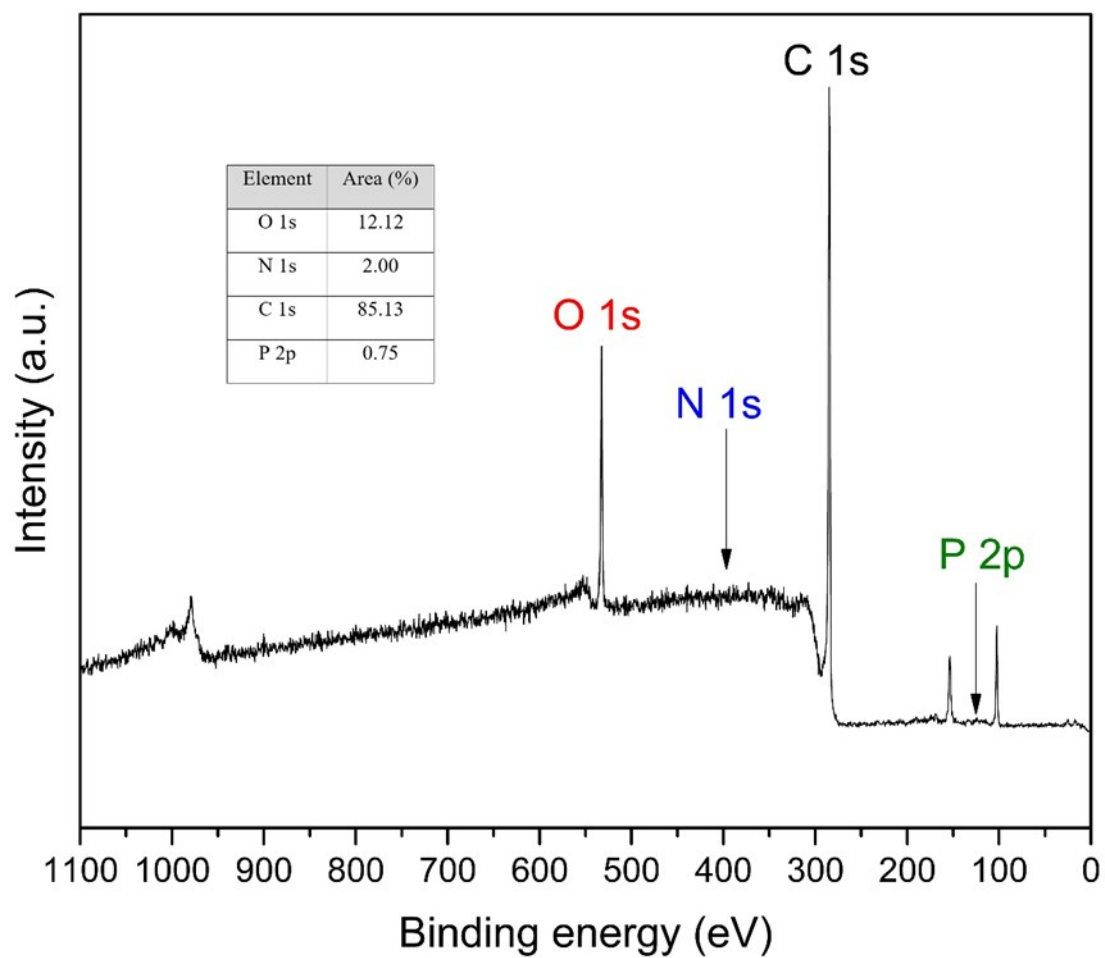

**Fig. S5:** XPS survey of NP-GNOs showing the involved chemical elements.

**Table S1:** Armando D. Martínez-Iniesta et al.

| Band                 | Center (eV) | FWHM      | Area (%) | Peak type |
|----------------------|-------------|-----------|----------|-----------|
| <b>NP-GNOs</b>       |             |           |          |           |
| D1                   | 1189.07126  | 130.56128 | 9.45569  | Lorentz   |
| D                    | 1349.90204  | 174.91736 | 41.548   | Gaussian  |
| D2                   | 1503.05972  | 140.05468 | 25.19844 | Lorentz   |
| G                    | 1593.74567  | 91.54132  | 23.79786 | Gaussian  |
| 2D <sub>1</sub>      | 2692.61773  | 329.15924 | 73.63682 | Lorentz   |
| 2D <sub>2</sub>      | 2900.97444  | 177.44249 | 26.36318 | Lorentz   |
| <b>Pristine-GNOs</b> |             |           |          |           |
| D1                   | 1183.92523  | 123.82133 | 7.1006   | Lorentz   |
| D                    | 1343.41408  | 196.60462 | 46.30472 | Gaussian  |
| D2                   | 1530.99408  | 158.55874 | 29.06389 | Lorentz   |
| G                    | 1594.37783  | 73.95061  | 17.53079 | Gaussian  |
| 2D <sub>1</sub>      | 2642.74319  | 386.75381 | 65.51345 | Lorentz   |
| 2D <sub>2</sub>      | 2903.7307   | 270.70193 | 34.48655 | Lorentz   |

**Table S1:** Data from Raman peaks deconvolution analysis for pristine (undoped) and NP-GNOs. Results for bands (D, D1, D2, G, 2D1, 2D2), the maximal intensity peaks position (center), full width at half maximum (FWHM), and the area under each curve, and curve-type used in the fitting.

**Table S2:** Armando D. Martínez-Iniesta et al.

| Chem. specie           | Center (eV) | FWHM    | Area (%) | Peak type |
|------------------------|-------------|---------|----------|-----------|
| <b>C 1s</b>            |             |         |          |           |
| COOH/C=O               | 286.65517   | 1.40102 | 6.34504  | Lorentz   |
| C-O/C-N/C-P            | 285.65552   | 1.00787 | 14.01249 | Gaussian  |
| C-C (sp <sup>3</sup> ) | 285.05737   | 0.8852  | 24.14133 | Gaussian  |
| C=C (sp <sup>2</sup> ) | 284.31446   | 1.01163 | 49.89124 | Gaussian  |
| Fe-C                   | 283.45696   | 0.81379 | 5.60986  | Lorentz   |

**Table S2:** Deconvolution data for C1s peak.**Table S3:** Armando D. Martínez-Iniesta et al.

| Chem. specie        | Center (eV) | FWHM    | Area (%) | Peak type |
|---------------------|-------------|---------|----------|-----------|
| <b>P 2p</b>         |             |         |          |           |
| P=O                 | 134.78238   | 0.77734 | 3.25223  | Gaussian  |
| P-O                 | 133.42952   | 1.66479 | 46.94409 | Gaussian  |
| P-C                 | 132.48108   | 1.1981  | 31.50545 | Gaussian  |
| P 2p <sup>1/2</sup> | 130.84083   | 1.11779 | 11.20512 | Gaussian  |
| P 2p <sup>3/2</sup> | 130.18969   | 0.73963 | 7.09312  | Gaussian  |

**Table S3:** Deconvolution data for P2p peak.



**Table S4:** Armando D. Martínez-Iniesta et al.

| Chem. specie | Center (eV) | FWHM    | Area (%) | Peak type |
|--------------|-------------|---------|----------|-----------|
| <b>N 1s</b>  |             |         |          |           |
| N-Quaternary | 401.94385   | 0.86928 | 3.13289  | Gaussian  |
| N-Pyrrolic   | 401.33066   | 1.20409 | 12.34172 | Gaussian  |
| Amine/amide  | 399.93583   | 1.55315 | 48.90862 | Gaussian  |
| N-Pyridinic  | 398.36004   | 1.53916 | 24.93183 | Gaussian  |
| N-Fe         | 396.60028   | 1.08285 | 10.68494 | Gaussian  |

**Table S4:** Deconvolution data for N1s peak.**Table S5:** Armando D. Martínez-Iniesta et al.

| Chem. specie              | Center (eV) | FWHM    | Area (%) | Peak type |
|---------------------------|-------------|---------|----------|-----------|
| <b>O 1s</b>               |             |         |          |           |
| COOH-C-O-C                | 533.27781   | 0.68103 | 13.52241 | Lorentz   |
| C-O/COO <sup>-</sup> /P-O | 532.85987   | 0.62359 | 30.80462 | Lorentz   |
| C=O/P=O                   | 532.47211   | 0.63717 | 33.74019 | Lorentz   |
| Fe-O                      | 532.06989   | 0.77418 | 21.93278 | Lorentz   |

**Table S5.** Deconvolution data for O1s peak.
